# Supplementary material for: Aripiprazole in the real-world treatment for irritability associated with autism spectrum disorder in children and adolescents in Japan: 52-week post-marketing surveillance
Source: PubMed Central journal article supplement (PMC8061053; doi:10.1186/s12888-021-03201-6), 2021-04-22

**Additional file 3. Patient distribution of CGI-I and CGI-S score**

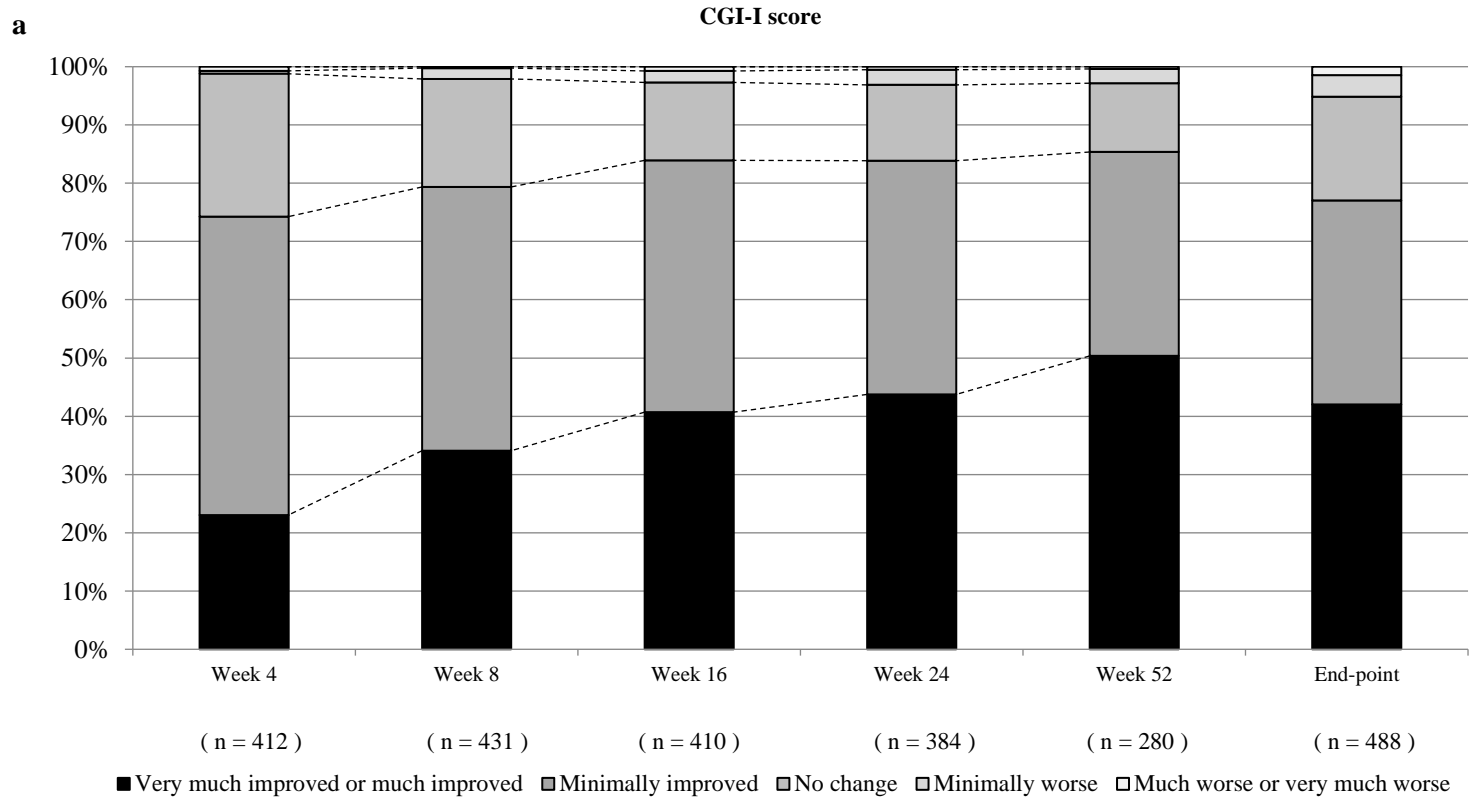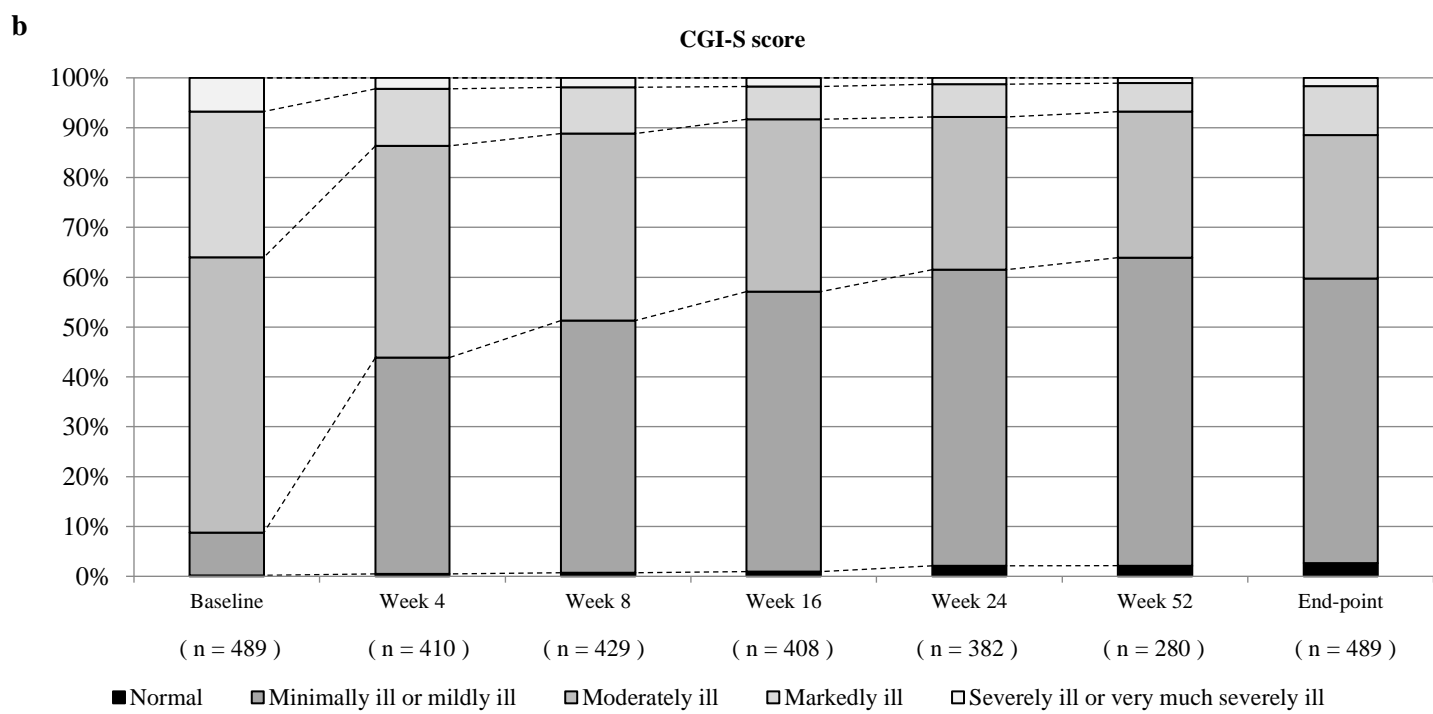

Supplement: 12888_2021_3201_MOESM3_ESM.pdf [file 12888_2021_3201_MOESM3_ESM.pdf]
