# Supplementary material for: Aripiprazole in the real-world treatment for irritability associated with autism spectrum disorder in children and adolescents in Japan: 52-week post-marketing surveillance
Source: Springer Nature journal article supplement (doi:10.1186/s12888-021-03201-6), 2021-04-22
Supplement: MOESM4 [file 19095248]

**Additional file 4.** Changes from baseline in height, weight and BMI

|                | Baseline                 |      |        | End-point (LOCF) |      |        | Change from baseline |      |       |       |
|----------------|--------------------------|------|--------|------------------|------|--------|----------------------|------|-------|-------|
|                | n                        | mean | SD     | n                | mean | SD     | n                    | mean | SD    |       |
| < 13 years old | Height (cm)              | 179  | 131.72 | 13.27            | 179  | 136.58 | 13.26                | 179  | 4.86  | 2.79  |
|                | Height z-score           | 179  | -0.20  | 1.10             | 179  | -0.19  | 1.07                 | 179  | 0.01  | 0.39  |
|                | Height percentile        | 179  | 45.34  | 29.96            | 179  | 46.00  | 29.57                | 179  | 0.66  | 12.24 |
|                | Weight (kg)              | 195  | 30.98  | 11.48            | 195  | 35.34  | 13.16                | 195  | 4.36  | 3.53  |
|                | Weight z-score           | 195  | -0.07  | 1.18             | 195  | 0.09   | 1.23                 | 195  | 0.16  | 0.45  |
|                | Weight percentile        | 195  | 48.76  | 31.21            | 195  | 53.25  | 32.25                | 195  | 4.49  | 12.25 |
|                | BMI (kg/m <sup>2</sup> ) | 178  | 17.49  | 3.66             | 178  | 18.54  | 4.14                 | 178  | 1.05  | 1.37  |
|                | BMI z-score              | 178  | 0.05   | 1.10             | 178  | 0.23   | 1.20                 | 178  | 0.18  | 0.58  |
|                | BMI percentile           | 178  | 50.65  | 30.31            | 178  | 56.25  | 31.51                | 178  | 5.60  | 15.22 |
| ≥13 years old  | Height (cm)              | 52   | 158.83 | 8.12             | 52   | 160.68 | 7.75                 | 52   | 1.85  | 2.19  |
|                | Height z-score           | 52   | -0.37  | 1.10             | 52   | -0.40  | 1.14                 | 52   | -0.03 | 0.27  |
|                | Height percentile        | 52   | 40.13  | 30.89            | 52   | 39.32  | 31.25                | 52   | -0.81 | 7.05  |
|                | Weight (kg)              | 56   | 52.61  | 12.02            | 56   | 56.53  | 13.38                | 56   | 3.92  | 4.61  |
|                | Weight z-score           | 56   | -0.15  | 1.34             | 56   | 0.01   | 1.36                 | 56   | 0.16  | 0.42  |
|                | Weight percentile        | 56   | 46.99  | 34.30            | 56   | 49.25  | 35.03                | 56   | 2.26  | 9.14  |
|                | BMI (kg/m <sup>2</sup> ) | 51   | 21.15  | 4.15             | 51   | 22.16  | 4.85                 | 51   | 1.01  | 1.63  |
|                | BMI z-score              | 51   | 0.10   | 1.23             | 51   | 0.26   | 1.25                 | 51   | 0.16  | 0.42  |
|                | BMI percentile           | 51   | 52.18  | 33.02            | 51   | 55.30  | 32.79                | 51   | 3.12  | 12.71 |
| Total          | Height (cm)              | 231  | 137.83 | 16.72            | 231  | 142.01 | 15.85                | 231  | 4.18  | 2.95  |
|                | Height z-score           | 231  | -0.24  | 1.10             | 231  | -0.23  | 1.09                 | 231  | 0.00  | 0.37  |
|                | Height percentile        | 231  | 44.17  | 30.18            | 231  | 44.50  | 30.02                | 231  | 0.33  | 11.28 |
|                | Weight (kg)              | 251  | 35.81  | 14.68            | 251  | 40.07  | 15.87                | 251  | 4.27  | 3.79  |
|                | Weight z-score           | 251  | -0.09  | 1.21             | 251  | 0.08   | 1.26                 | 251  | 0.16  | 0.44  |
|                | Weight percentile        | 251  | 48.36  | 31.86            | 251  | 52.35  | 32.86                | 251  | 3.99  | 11.65 |
|                | BMI (kg/m <sup>2</sup> ) | 229  | 18.30  | 4.06             | 229  | 19.35  | 4.55                 | 229  | 1.04  | 1.43  |
|                | BMI z-score              | 229  | 0.06   | 1.13             | 229  | 0.23   | 1.21                 | 229  | 0.17  | 0.55  |
|                | BMI percentile           | 229  | 50.99  | 30.87            | 229  | 56.04  | 31.73                | 229  | 5.05  | 14.70 |
